# Supplementary material for: Prescribing Patterns for Sodium-Glucose Cotransporter 2 Inhibitors: A Survey of Nephrologists
Source: PubMed Central journal article supplement — Kidney Int Rep. 2023 May 9;8(8):1669–71. doi: 10.1016/j.ekir.2023.05.001 (PMC10403664; doi:10.1016/j.ekir.2023.05.001), 2023-05-09
Supplement: mmc1.pdf [file mmc1.pdf]

1. At what level of your career are you?
  - A. Nephrology training
  - B. Working as nephrologist for less than 5 years
  - C. Working as nephrologist since 5-10 years
  - D. Working as a nephrologist since 10-15 years
  - E. Working as a nephrologist for >15 years
  - F. Subspecialty in nephrology
  
2. Practice location (will include country as a free text for continents below)
  - United States
  - Canada
  - South America
  - Europe
  - Asia
  - Africa
  - Australia/New Zealand
  - Write your country
  
3. Practice type
  - A. Private practice
  - B. Community Hospital
  - C. University Hospital
  - D. Research Facility
  - E. Industry
  - F. Other
  
4. How much time do you spend in clinical practice?
  - A. 0-25%
  - B. 25-50%
  - C. 50-75%
  - D. >75%
  
5. Do you know indications for SGLT2i in your patient population?
  - A. Very well
  - B. Somewhat
  - C. Not at all
  
6. How often do you prescribe SGLT2i for your diabetic patients who meet indications per KDIGO guidelines?
  - A. 100% of patients
  - B. 50% of patients
  - C. <50% of patients
  - D. I recommend patient' PCP or endocrine to prescribe SGLT2i

7. How often do you prescribe SGLT2i in your non- diabetic patients with proteinuria?
  - A. 100% of patients
  - B. 50% of patients
  - C. <50% of patients
  - D. I recommend patient' PCP or endocrine to prescribe SGLT2i
  
8. What are the barriers that prevent you from prescribing SGLT2i in your patients? Please choose all that apply.
  - a. Lack of experience and comfort in prescribing SGLT2i
  - b. Lack of time to discuss the benefits and side effects of the drug with patients
  - c. Lack of time and personnel in managing side effects and changing other medications after office visit
  - d. Lack of availability of drug in my country
  - e. Lack of insurance/prohibitively high co-pay
  - f. Other- free text
  
9. What has helped the most in prescribing SGLT2i in your patients? Please choose all that apply,
  - a. Readily available medical knowledge through social media discussion and communications
  - b. Participation in professional Conferences such as ASN/ISN/ERA
  - c. Professional guidelines
  - d. Good local support system in the clinic like RN or pharmacist support
  - e. Pop-up reminder in your electronic health records
  - f. Industry Sponsored educational sessions
  - g. Via Pharmaceutical representatives
  - h. Other

Table S1 Demographics of survey respondents

|                                                                                 | Survey Responders N<br>(%) Total N = 161 |
|---------------------------------------------------------------------------------|------------------------------------------|
| Q1. At What level of career are you                                             |                                          |
| Trainee or recent graduate                                                      | 82 (51%)                                 |
| Practicing nephrologist >5years                                                 | 79 (48%)                                 |
| Q2. Where do you practice                                                       |                                          |
| In United States                                                                | 64 (40%)                                 |
| Outside United States                                                           | 97 (60%)                                 |
| Europe                                                                          | 35 (22%)                                 |
| Asia                                                                            | 28 (17%)                                 |
| South America                                                                   | 15 (9%)                                  |
| Africa                                                                          | 4 (3%)                                   |
| Australia/New Zealand                                                           | 4 (3%)                                   |
| Did not specify the country                                                     | 11 (7%)                                  |
| Q3. Practice Type                                                               |                                          |
| Academic Practice                                                               | 72 (45%)                                 |
| Private Practice                                                                | 89 (55%)                                 |
| Q4. Time spent in clinical practice                                             |                                          |
| <50% time                                                                       | 28 (17%)                                 |
| >50% time                                                                       | 133 (83%)                                |
| Q5. Do you know the indications for SGLT2i                                      |                                          |
| Not to somewhat well                                                            | 62 (39%)                                 |
| Very well                                                                       | 99 (61%)                                 |
| Q6. How often do you prescribe SGLT2i in diabetic patients per KDIGO guidelines |                                          |
| ≥50% of patients                                                                | 88 (55%)                                 |
| <50% of patients                                                                | 37 (23%)                                 |
| Recommend to primary care physician                                             | 36 (22%)                                 |
| Q7. How often do you prescribe SGLT2i in non-diabetic patients with proteinuria |                                          |
| >50% of patients                                                                | 60 (37%)                                 |
| <50% of patients                                                                | 80 (50%)                                 |
| Recommend to primary care physician                                             | 21 (13%)                                 |
